# Supplementary material for: CT-based Rapid Triage of COVID-19 Patients: Risk Prediction and Progression Estimation of ICU Admission, Mechanical Ventilation, and Death of Hospitalized Patients
Source: bioRxiv or medRxiv preprint supplement (doi:10.1101/2020.11.04.20225797), 2020-11-06

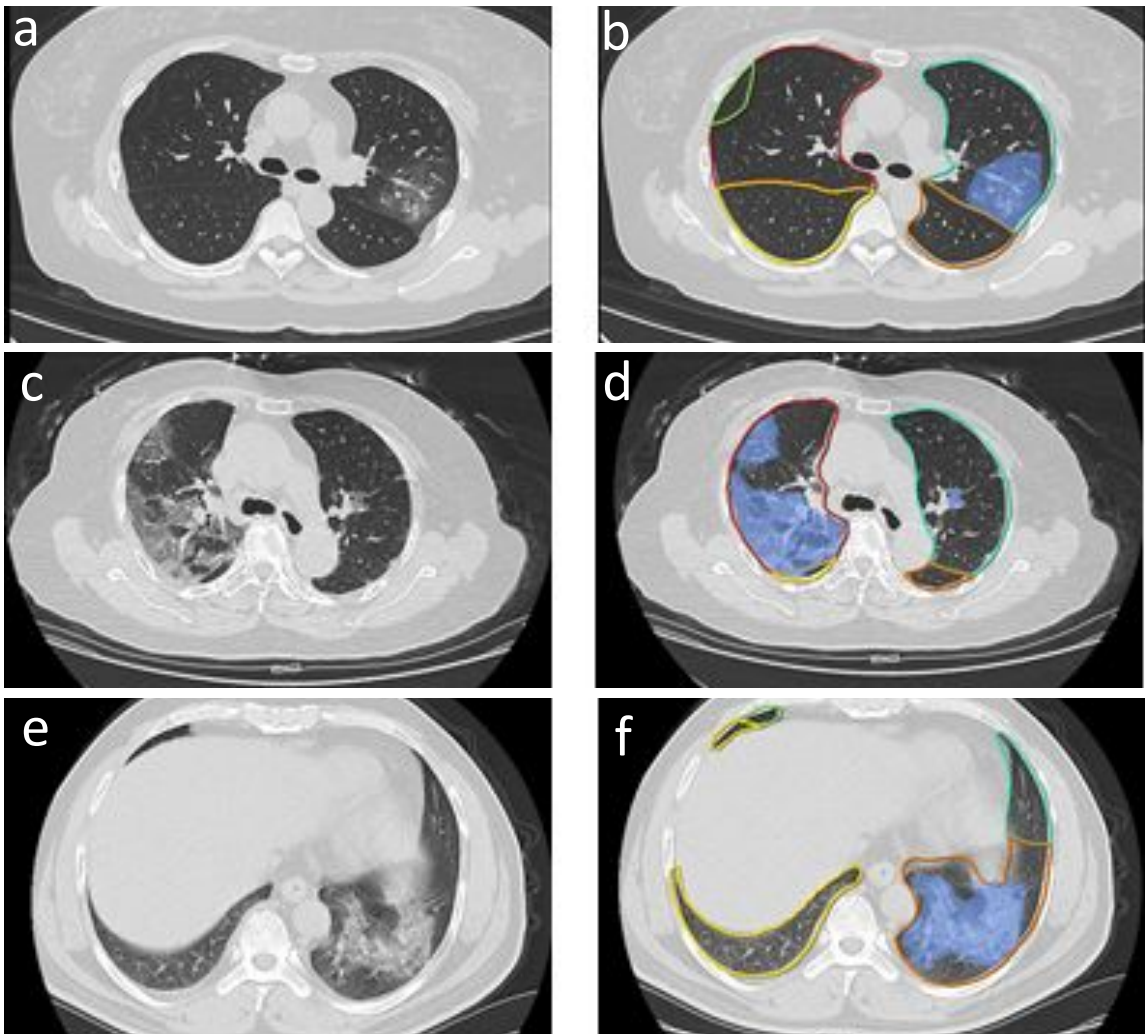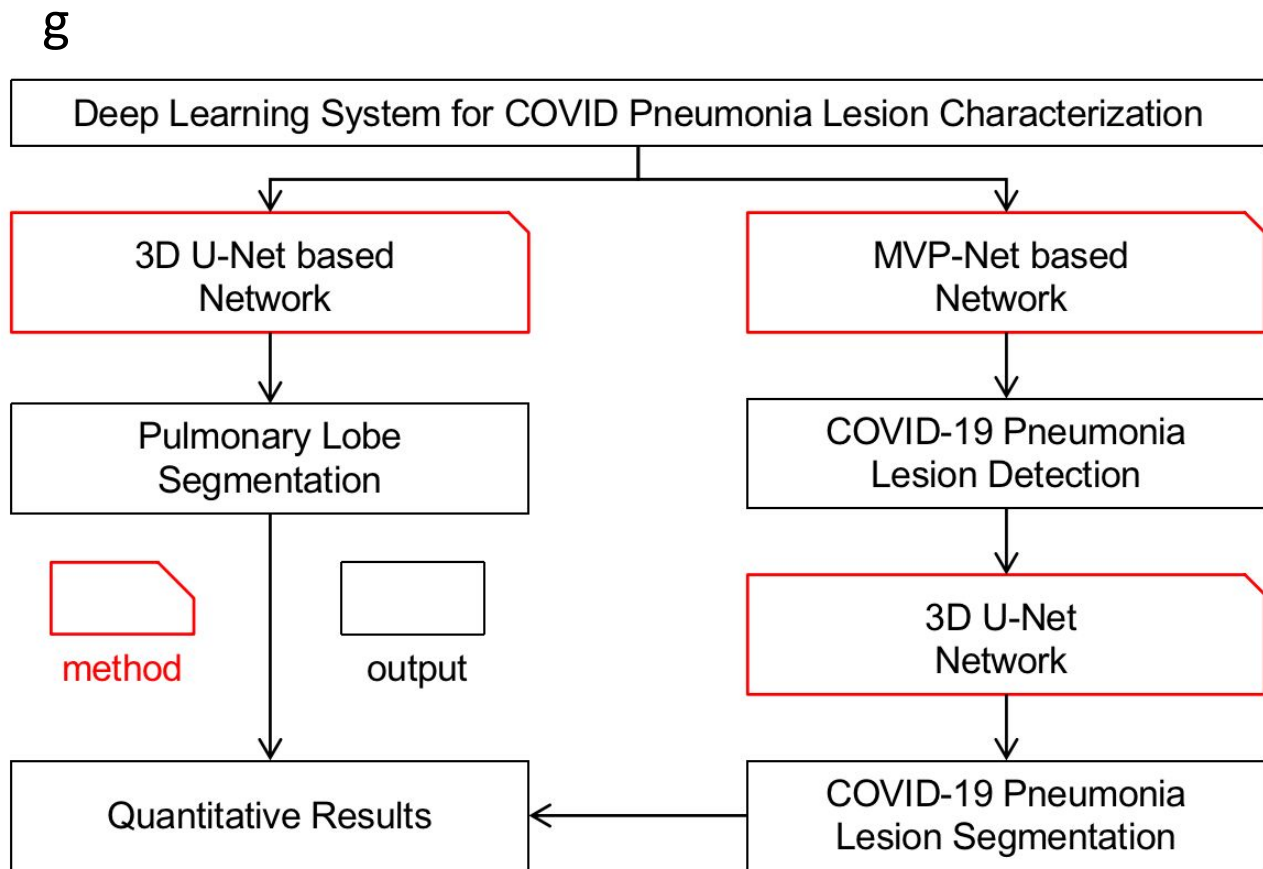

Supplement: Supplementary file [file media-2.pdf]
